# Supplementary material
Source: Springer Nature journal article supplement (https://www.springermedizin.de/resource/supplementary/12936_2011_2143_MOESM6_ESM.pdf/9542622)
Supplement: MOESM6 [file 9542622]

| Patient ID | Age (yr) | Gender (M/F) | Taking antimalarial med (Y/N) | Blood smear                 | Axillary temperature (°C) | RDT for P.f. | Conc.                   |
|------------|----------|--------------|-------------------------------|-----------------------------|---------------------------|--------------|-------------------------|
|            |          |              |                               | parasite density P.f. (/uL) |                           |              | PfHRP2 by ELISA (pg/mL) |
| S-01       | 24       | M            | N                             | 5,400                       | 37.0                      | P            | 62                      |
| S-02       | 45       | M            | Y                             | 800                         | 35.7                      | N            | 1167                    |
| S-03       | 45       | F            | N                             | 32,000                      | 38.0                      | P            | 538                     |
| S-04       | 23       | F            | N                             | 1,600                       | 37.2                      | P            | 17                      |
| S-05       | 36       | M            | N                             | 3,200                       | 35.7                      | P            | 731                     |
| S-06       | 57       | M            | N                             | packed field                | 38.2                      | P            | 479                     |
| S-07       | 15       | M            | N                             | 6,400                       | 36.1                      | P            | 94                      |
| S-08       | 13       | F            | N                             | 19,200                      | 35.2                      | P            | 195                     |
| S-09       | 39       | M            | N                             | N/A                         | N/A                       | N/A          | < LOD                   |
| S-10       | 22       | F            | N                             | N/A                         | N/A                       | N/A          | < LOD                   |
| S-11       | 24       | M            | N                             | N/A                         | N/A                       | N/A          | < LOD                   |
| S-12       | 34       | M            | N                             | N/A                         | N/A                       | N/A          | < LOD                   |
| S-13       | 34       | M            | N                             | N/A                         | N/A                       | N/A          | < LOD                   |
| S-14       | 26       | M            | N                             | N/A                         | N/A                       | N/A          | < LOD                   |
| S-15       | 22       | F            | N                             | N/A                         | N/A                       | N/A          | < LOD                   |
| S-16       | 23       | F            | N                             | N/A                         | N/A                       | N/A          | < LOD                   |
| S-17       | 25       | M            | N                             | N/A                         | N/A                       | N/A          | < LOD                   |
| S-18       | 25       | M            | N                             | N/A                         | N/A                       | N/A          | < LOD                   |
| S-19       | 30       | F            | N                             | N/A                         | N/A                       | N/A          | < LOD                   |
| S-20       | 31       | F            | N                             | N/A                         | N/A                       | N/A          | < LOD                   |
| S-21       | 33       | F            | N                             | N/A                         | N/A                       | N/A          | < LOD                   |
| S-22       | 22       | M            | N                             | N/A                         | N/A                       | N/A          | < LOD                   |
| S-23       | 36       | F            | N                             | N/A                         | N/A                       | N/A          | < LOD                   |
| S-24       | 67       | M            | N                             | N/A                         | N/A                       | N/A          | < LOD                   |

| Symptoms<br>(Typical/Atypical) | Patient ID | ELISA<br>signal<br>(Counts) |
|--------------------------------|------------|-----------------------------|
| T                              | P-1        | 26865061                    |
| T                              | P-3        |                             |
| T                              | P-4        | 11757242                    |
| T                              | P-5        | 4805714                     |
| T                              | P-6        | 1.88E+08                    |
| T                              | P-7        | 1.24E+08                    |
| T                              | P-8        | 25070313                    |
| T                              | P-9        | 51333513                    |
| N/A                            | N-12       | 12099.5                     |
| N/A                            | N-13       | 25308                       |
| N/A                            | N-14       | 5124.5                      |
| N/A                            | N-15       | 34649.75                    |
| N/A                            | N-16       | 11533                       |
| N/A                            | N-17       | 50891.5                     |
| N/A                            | N-18       | 31066.5                     |
| N/A                            | N-19       | 126624.5                    |
| N/A                            | N-20       | 54916.25                    |
| N/A                            | N-21       | 34658                       |
| N/A                            | N-22       | 53699.25                    |
| N/A                            | N-23       | 111574.8                    |
| N/A                            | N-24       | 24932.75                    |
| N/A                            | N-25       | 17466.25                    |
| N/A                            | N-26       | 45124.5                     |
| N/A                            | N-27       | 21183                       |
